# Supplementary material for: Updating Insights into the Catalytic Domain Properties of Plant Cellulose synthase (CesA) and Cellulose synthase-like (Csl) Proteins
Source: Molecules. 2021 Jul 17;26(14):4335. doi: 10.3390/molecules26144335 (PMC8306620; doi:10.3390/molecules26144335)
Supplement: Supplementary file 1 [file molecules-26-04335-s001.zip]

Archive with 5 entries (5 files):
- Figure S1.pdf
- Table_S1.xlsx
- Table_S2_R1.xlsx
- Table_S3.xls
- Table_S4.pdf
