# Supplementary material for: Updating Insights into the Catalytic Domain Properties of Plant Cellulose synthase (CesA) and Cellulose synthase-like (Csl) Proteins
Source: Molecules. 2021 Jul 17;26(14):4335. doi: 10.3390/molecules26144335 (PMC8306620; doi:10.3390/molecules26144335)
Supplement: Supplementary file 1 [file molecules-26-04335-s001.zip › Table_S1.xlsx]

## Sheet: Sheet1
Table S1. Accession numbers and amino acid length of Arabidopsis and rice CesA and Csl proteins. Proteins selected for 3D modeling are presented in bold.
	Organism	Protein name	Uniprot	Length (aa)	catalytic domain coordinates
CesA	Arabidopsis thaliana	CesA1	O48946	1081	341-845
	Arabidopsis thaliana	CesA2	O48947	1084	343-849
	Arabidopsis thaliana	CesA3	Q941L0	1065	325-830
	Arabidopsis thaliana	CesA4	Q84JA6	1049	281-813
	Arabidopsis thaliana	CesA5	Q8L778	1069	330-835
	Arabidopsis thaliana	CesA6	Q94JQ6	1084	342-850
	Arabidopsis thaliana	CesA7	Q9SWW6	1026	304-792
	Arabidopsis thaliana	CesA8	Q8LPK5	985	250-749
	Arabidopsis thaliana	CesA9	Q9SJ22	1088	348-853
	Arabidopsis thaliana	CesA10	Q9SKJ5	1065	328-832
	Oryza sativa	CesA1	Q6AT26	1076	338-840
	Oryza sativa	CesA2	Q84M43	1073	335-838
	Oryza sativa	CesA3	Q69V23	1093	345-858
	Oryza sativa	CesA4	Q5JN63	989	255-754
	Oryza sativa	CesA5	Q851L8	1092	344-857
	Oryza sativa	CesA6	Q6YVM4	1092	345-857
	Oryza sativa	CesA7	Q9AV71	1063	279-827
	Oryza sativa	CesA8	Q84ZN6	1081	342-846
	Oryza sativa	CesA9	Q69P51	1055	333-819
	Oryza sativa	CesA10	A0A0P0YA68	338	19-338
	Oryza sativa	CesA11	Q69XK5	860	114-613
CslD	Arabidopsis thaliana	CslD1	O49323	1036	249-804
	Arabidopsis thaliana	CslD2	Q9LFL0	1145	363-911
	Arabidopsis thaliana	CslD3	Q9M9M4	1145	360-911
	Arabidopsis thaliana	CslD4	Q9SZL9	1111	338-872
	Arabidopsis thaliana	CslD5	Q9SRW9	1181	384-947
	Arabidopsis thaliana	CslD6	Q9FVR3	979	188-746
	Oryza sativa	CslD1	Q8W3F9	1127	333-891
	Oryza sativa	CslD2	Q9LHZ7	1170	382-936
	Oryza sativa	CslD3	Q7EZW6	1147	363-910
	Oryza sativa	CslD4	Q2QNS6	1215	393-969
	Oryza sativa	CslD5	Q5Z6E5	1012	221-780
OsCSLF	Oryza sativa	CslF1	Q6ZF89	860	134-612
	Oryza sativa	CslF2	Q84S11	889	164-642
	Oryza sativa	CslF3	Q6ZF85	868	157-636
	Oryza sativa	CslF4	Q6ZF86	897	164-651
	Oryza sativa	CslF6	Q84UP7	952	173-699
	Oryza sativa	CslF7	Q94GM9	830	139-594
	Oryza sativa	CslF8	Q84S18	886	159-640
	Oryza sativa	CslF9	Q7XHV0	884	145-628
AtCSLB	Arabidopsis thaliana	CslB1	O80898	757	88-527
	Arabidopsis thaliana	CslB2	O80899	757	88-526
	Arabidopsis thaliana	CslB3	Q8RX83	755	88-526
	Arabidopsis thaliana	CslB4	O80891	755	88-526
	Arabidopsis thaliana	CslB5	Q0WT40	757	88-525
	Arabidopsis thaliana	CslB6	O23386	757	88-524
OsCSLH	Oryza sativa	CslH1	Q339N5	750	87-524
	Oryza sativa	CslH2	Q7XUT9	762	120-535
	Oryza sativa	CslH3	Q7XUU0	792	97-566
CslE	Arabidopsis thaliana	CSLE1	Q8VZK9	729	103-507
	Oryza sativa	CSLE1	Q651X7	737	97-515
	Oryza sativa	CSLE2	Q0DXZ1	745	105-522
	Oryza sativa	CSLE6	Q651X6	728	92-510
AtCslG	Arabidopsis thaliana	CslG1	Q570S7	760	94-511
	Arabidopsis thaliana	CslG2	Q8VYR4	722	91-501
	Arabidopsis thaliana	CslG3	Q0WVN5	751	113-530
CslA	Arabidopsis thaliana	CslA1	Q84W54	553	57-381
	Arabidopsis thaliana	CslA2	Q9FNI7	534	30-354
	Arabidopsis thaliana	CslA3	Q9LQC9	556	52-377
	Arabidopsis thaliana	CslA7	Q9ZQN8	556	52-376
	Arabidopsis thaliana	CslA9	Q9LZR3	533	30-354
	Arabidopsis thaliana	CslA10	Q9LR87	552	55-379
	Arabidopsis thaliana	CslA11	Q9LF09	443	1-270
	Arabidopsis thaliana	CslA14	Q84W06	535	23-352
	Arabidopsis thaliana	CslA15	Q9T0L2	537	44-368
	Oryza sativa	CslA1	Q7PC76	521	16-341
	Oryza sativa	CslA2	Q7PC67	580	71-400
	Oryza sativa	CslA3	Q67X45	551	43-372
	Oryza sativa	CslA4	Q8S7W0	549	28-369
	Oryza sativa	CslA5	Q7PC73	574	59-391
	Oryza sativa	CslA6	Q6Z2T9	574	72-398
	Oryza sativa	CslA7	Q7XIF5	585	81-406
	Oryza sativa	CslA9	Q67VS7	527	17-349
	Oryza sativa	CslA11	Q6YWK8	570	38-375
CslC	Arabidopsis thaliana	CslC4	Q9LJP4	673	115-455
	Arabidopsis thaliana	CslC5	Q9SB75	692	134-483
	Arabidopsis thaliana	CslC6	Q9SRT3	682	135-477
	Arabidopsis thaliana	CslC8	Q9SJA2	690	134-483
	Arabidopsis thaliana	CslC12	Q9ZQB9	699	152-497
	Oryza sativa	CslC1	Q8LIY0	690	141-489
	Oryza sativa	CslC2	Q69L19	698	145-489
	Oryza sativa	CslC3	Q7PC69	745	138-517
	Oryza sativa	CslC7	Q6L538	688	143-486
	Oryza sativa	CslC9	Q6AU53	595	52-394
	Oryza sativa	CslC10	Q84Z01	686	142-484
