# Supplementary material for: Updating Insights into the Catalytic Domain Properties of Plant Cellulose synthase (CesA) and Cellulose synthase-like (Csl) Proteins
Source: Molecules. 2021 Jul 17;26(14):4335. doi: 10.3390/molecules26144335 (PMC8306620; doi:10.3390/molecules26144335)
Supplement: Supplementary file 1 [file molecules-26-04335-s001.zip › Table_S2_R1.xlsx]

## Sheet: Sheet1
Table S2. CesA and Csl proteins of representative angiosperms.
Clade	Clade	Clade	Order	Family	Species		Gene/Protein ID	Database
Angiosperms	Eudicots	Rosids	Brassicales	Brassicaceae	Arabidopsis thaliana	AtCesA1	O48946	UniProt (www.uniprot.org)
						AtCesA2	O48947
						AtCesA3	Q941L0
						AtCesA4	Q84JA6
						AtCesA5	Q8L778
						AtCesA6	Q94JQ6
						AtCesA7	Q9SWW6
						AtCesA8	Q8LPK5
						AtCesA9	Q9SJ22
						AtCesA10	Q9SKJ5
						AtCslD1	O49323
						AtCslD2	Q9LFL0
						AtCslD3	Q9M9M4
						AtCslD4	Q9SZL9
						AtCslD5	Q9SRW9
						AtCslD6	Q9FVR3
						AtCslB1	O80898
						AtCslB2	O80899
						AtCslB3	Q8RX83
						AtCslB4	O80891
						AtCslB5	Q0WT40
						AtCslB6	O23386
						AtCSLE1	Q8VZK9
						AtCslG1	Q570S7
						AtCslG2	Q8VYR4
						AtCslG3	Q0WVN5
						AtCslA1	Q84W54
						AtCslA2	Q9FNI7
						AtCslA3	Q9LQC9
						AtCslA7	Q9ZQN8
						AtCslA9	Q9LZR3
						AtCslA10	Q9LR87
						AtCslA11	Q9LF09
						AtCslA14	Q84W06
						AtCslA15	Q9T0L2
						AtCslC4	Q9LJP4
						AtCslC5	Q9SB75
						AtCslC6	Q9SRT3
						AtCslC8	Q9SJA2
						AtCslC12	Q9ZQB9
Angiosperms	Eudicots	Rosids	Cucurbitales	Cucurbitaceae	Cucumis sativus	CsCesA	Csa1G470270/A0A0A0M078	UniProt (www.uniprot.org)
						CsCesA	Csa2G070320/A0A0A0LGY8
						CsCslC	Csa2G353490/A0A0A0LR13
						CsCslA	Csa2G386160/A0A0A0LMN0
						CsCslB	Csa2G416170/A0A0A0LT64
						CsCslB	Csa2G416190/A0A0A0LN39
						CsCslB	Csa2G416240/A0A0A0LQD3
						CsCslB	Csa2G416250/A0A0A0LMT9
						CsCslD	Csa2G433910/A0A0A0LTP0
						CsCslD	Csa2G433920/A0A0A0LRD4
						CsCslD	Csa3G132550/A0A0A0L4Q8
						CsCslA	Csa3G748790/A0A0A0LAQ4
						CsCesA	Csa3G878780/A0A0A0LGP4
						CsCslC	Csa3G881920/A0A0A0LDV7
						CsCslD	Csa4G002510/A0A0A0KV93
						CsCslD	Csa4G002520/A0A0A0KT82
						CsCslG	Csa4G053250/A0A0A0KZW9
						CsCslG	Csa4G053260/A0A0A0KYG4
						CsCslG	Csa4G053780/A0A0A0KUZ9
						CsCslG	Csa4G054280/A0A0A0KZX5
						CsCslG	Csa4G054290/Csa4G054290
						CsCesA	Csa4G166980/A0A0A0KYD3
						CsCslC	Csa4G645250/A0A0A0L2N3
						CsCslC	Csa5G630970/A0A0A0KRZ9
						CsCesA	Csa6G014800/A0A0A0K7X1
						CsCesA	Csa6G088080/A0A0A0K9D3
						CsCslA	Csa6G150530/A0A0A0KDJ3
						CsCslA	Csa6G450350/A0A0A0KEU4
						CsCslA	Csa6G450360/A0A0A0KKD8
						CsCesA	Csa6G486700/A0A0A0KJ39
						CsCslD	Csa7G029410/A0A0A0K6B5
						CsCslE	Csa7G127380/A0A0A0K3H7
						CsCslE	Csa7G129380/A0A0A0K545
						CsCslE	Csa7G200810/A0A0A0K3P6
						CsCslC	Csa7G363050/A0A0A0KA11
						CsCesA	Csa7G428160/A0A0A0K6K2
Angiosperms	Monocots	Commelinids	Poales	Bromeliaceae	Ananas comosus	AcoCesA1	Aco014283	Phytozome_v12.1 Ananas comosus v3 (Pineapple) (phytozome.jgi.doe.gov/pz/portal.html)
						AcoCesA2	Aco018229
						AcoCesA3	Aco024230
						AcoCesA4	Aco014585
						AcoCesA5	Aco018552
						AcoCesA7	Aco012076
						AcoCesA8	Aco006039
						AcoCslA1	Aco001096
						AcoCslA2	Aco006900
						AcoCslA3	Aco001095
						AcoCslA4	Aco004149
						AcoCslA6	Aco002889
						AcoCslA9	Aco016682
						AcoCslA11	Aco01468
						AcoCslC1	Aco004974
						AcoCslC4	Aco000968
						AcoCslC5	Aco008242
						AcoCslC6	Aco013494
						AcoCslC8	Aco011603
						AcoCslC12	Aco00859
						AcoCslD1	Aco004435
						AcoCslD2	Aco015969
						AcoCslD3	Aco030607
						AcoCslD4	Aco017129
						AcoCslD5	Aco013738
						AcoCslD6	Aco016995
						AcoCslD7	Aco025070
						AcoCslD8	Aco017291
						AcoCslE1	Aco026335
						AcoCslE2	Aco000884
						AcoCslG1	Aco013153
						AcoCslJ1	Aco013513
						AcoCslC8	Aco011603
						AcoCslC12	Aco00859
						AcoCslD1	Aco004435
						AcoCslD2	Aco015969
						AcoCslD3	Aco030607
						AcoCslD4	Aco017129
						AcoCslD5	Aco013738
						AcoCslD6	Aco016995
						AcoCslD7	Aco025070
						AcoCslD8	Aco017291
						AcoCslE1	Aco026335
						AcoCslE2	Aco000884
						AcoCslG1	Aco013153
						AcoCslJ1	Aco013513
Angiosperms	Eudicots	Asterids	Solanales	Solanaceae	Solanum lycopersicum	SlCslJ	Solyc00g027990.1.1/A0A494G959	UniProt (www.uniprot.org)
						SlCslE	Solyc00g030000.1.1/A0A494G999
						SlCslD	Solyc01g067520.3.1/A0A3Q7EFX4
						SlCesA	Solyc01g087210.3.1/A0A3Q7EJE4
						SlCesA	Solyc02g072240.3.1/A0A3Q7F4R8
						SlCslJ	Solyc03g005450.3.1/A0A3Q7FEW0
						SlCslD	Solyc03g097050.3.1/A0A3Q7FMM6
						SlCesA	Solyc04g071650.3.1/A0A3Q7G6I1
						SlCesA	Solyc04g072790.2.1/A0A3Q7G879
						SlCslD	Solyc05g053560.3.1/ A0A3Q7GK34
						SlCslD	Solyc05g053565.1.1/A0A3Q7HGE2
						SlCesA	Solyc07g005840.2.1/K4CB55
						SlCslJ	Solyc07g043390.3.1/A0A3Q7HCE6
						SlCslB	Solyc07g051820.3.1/A0A3Q7HBA1
						SlCslE	Solyc07g065660.3.1/A0A3Q7HIV8
						SlCslD	Solyc08g005280.2.1/A0A3Q7IDF4
						SlCesA	Solyc08g061100.3.1/A0A3Q7IID5
						SlCslD	Solyc08g076320.3.1/A0A3Q7HTK7
						SlCslG	Solyc08g082640.2.1/UPI000276C8C4
						SlCslG	Solyc08g082660.2.1/UPI000276C8C6
						SlCslG	Solyc08g082670.3.1/A0A3Q7HWX2
						SlCesA	Solyc09g055560.1.1/K4CT53
						SlCesA	Solyc09g072820.3.1/A0A3Q7I4R3
						SlCslD	Solyc09g075550.3.1/A0A3Q7J1N8
						SlCslD	Solyc10g074620.2.1/A0A3Q7IIA8
						SlCslA	Solyc11g007600.2.1/A0A3Q7IQ86
						SlCslG	Solyc12g014430.2.1A0A3Q7J4Q4
						SlCslE	Solyc12g015770.2.1/A0A3Q7J5K8
						SlCesA	Solyc12g056580.2.1/A0A3Q7JAF3
						SlCslG	Solyc08g082670.3.1/A0A3Q7HWX2
						SlCesA	Solyc09g031570.1.1/A0A3Q7I2C7
						SlCesA	Solyc09g055560.1.1/K4CT53
						SlCesA	Solyc09g072820.3.1/A0A3Q7I4R3
						SlCslD	Solyc09g075550.3.1/A0A3Q7J1N8
						SlCesA	Solyc10g038020.2.1/A0A3Q7IET2
						SlCslD	Solyc10g074620.2.1/A0A3Q7IIA8
						SlCesA	Solyc11g005560.2.1/A0A3Q7IP44
						SlCslA	Solyc11g007600.2.1/A0A3Q7IQ86
						SlCesA	Solyc11g050810.1.1/K4D8P4
						SlCesA	Solyc11g056590.2.1/A0A3Q7IXL9
						SlCslG	Solyc12g014430.2.1/A0A3Q7J4Q4
						SlCslE	Solyc12g015770.2.1/A0A3Q7J5K8
						SlCesA	Solyc12g056580.2.1/A0A3Q7JAF3
Angiosperms	Monocots	Commelinids	Poales	Poaceae	Oryza sativa	OsCesA1	Q6AT26	UniProt (www.uniprot.org)
						OsCesA2	Q84M43
						OsCesA3	Q69V23
						OsCesA4	Q5JN63
						OsCesA5	Q851L8
						OsCesA6	Q6YVM4
						OsCesA7	Q9AV71
						OsCesA8	Q84ZN6
						OsCesA9	Q69P51
						OsCesA10	A0A0P0YA68
						OsCesA11	Q69XK5
						OsCslD1	Q8W3F9
						OsCslD2	Q9LHZ7
						OsCslD3	Q7EZW6
						OsCslD4	Q2QNS6
						OsCslD5	Q5Z6E5
						OsCslF1	Q6ZF89
						OsCslF2	Q84S11
						OsCslF3	Q6ZF85
						OsCslF4	Q6ZF86
						OsCslF6	Q84UP7
						OsCslF7	Q94GM9
						OsCslF8	Q84S18
						OsCslF9	Q7XHV0
						OsCslH1	Q339N5
						OsCslH2	Q7XUT9
						OsCslH3	Q7XUU0
						OsCSLE1	Q651X7
						OsCSLE2	Q0DXZ1
						OsCSLE6	Q651X6
						OsCslA1	Q7PC76
						OsCslA2	Q7PC67
						OsCslA3	Q67X45
						OsCslA4	Q8S7W0
						OsCslA5	Q7PC73
						OsCslA6	Q6Z2T9
						OsCslA7	Q7XIF5
						OsCslA9	Q67VS7
						OsCslA11	Q6YWK8
						OsCslC1	Q8LIY0
						OsCslC2	Q69L19
						OsCslC3	Q7PC69
						OsCslC7	Q6L538
						OsCslC9	Q6AU53
						OsCslC10	Q84Z01
Angiosperms	Eudicots	Rosids	Malvales	Malvaceae	Gossypium hirsutum	GhCesA6_09	Gohir.D11G226600.1	CottonGen (www.cottongen.org)
						GhCesA6_04	Gohir.A11G218600.1
						GhCesA6_05	Gohir.A12G092000.1
						GhCesA6_10	Gohir.D12G092600.1
						GhCesA6_06	Gohir.D03G048100.1
						GhCesA6_01	Gohir.A02G137400.1
						GhCesA6_07	Gohir.D05G245300.1
						GhCesA6_02	Gohir.A05G244300.1
						GhCesA6_08	Gohir.D06G116700.1
						GhCesA6_03	Gohir.A06G111500.1
						GhCesA3_04	Gohir.D03G068100.1
						GhCesA3_01	Gohir.A02G108100.1
						GhCesA3_05	Gohir.D08G063800.1
						GhCesA3_02	Gohir.A08G054100.1
						GhCesA3_06	Gohir.D08G165300.1
						GhCesA3_03	Gohir.A08G144300.1
						GhCesA1_01	Gohir.A05G008500.1
						GhCesA1_04	Gohir.D05G009900.1
						GhCesA1_03	Gohir.D05G009200.1
						GhCesA1_02	Gohir.A05G009200.1
						GhCesA7_03	Gohir.D05G009400.1
						GhCesA7_01	Gohir.A05G008700.1
						GhCesA7_04	Gohir.D07G041900.1
						GhCesA7_02	Gohir.A07G037800.1
						GhCesA8_01	Gohir.A10G035300.1
						GhCesA8_03	Gohir.D10G036000.1
						GhCesA8_02	Gohir.D05G156700.1
						GhCesA4_04	Gohir.D08G056300.1
						GhCesA4_02	Gohir.A08G045800.1
						GhCesA4_03	Gohir.D07G210700.1
						GhCesA4_01	Gohir.A07G204700.1
						GhCSLD_11	Gohir.D12G131700.1
						GhCSLD_05	Gohir.A12G128000.1
						GhCSLD_08	Gohir.D04G151200.1
						GhCSLD_03	Gohir.A04G110900.1
						GhCSLD_04	Gohir.A09G203100.1
						GhCSLD_10	Gohir.D09G197200.1
						GhCSLD_06	Gohir.A12G205900.1
						GhCSLD_12	Gohir.D12G208200.1
						GhCSLD_09	Gohir.D08G242000.1
						GhCSLD_01	Gohir.1Z028500.1
						GhCSLD_07	Gohir.D03G050700.1
						GhCSLD_02	Gohir.A02G140200.1
						GhCSLE_14	Gohir.D11G245800.1
						GhCSLE_05	Gohir.A11G235000.1
						GhCSLE_15	Gohir.D11G245900.1
						GhCSLE_06	Gohir.A11G235100.1
						GhCSLE_12	Gohir.D11G245500.1
						GhCSLE_01	Gohir.1Z047900.1
						GhCSLE_04	Gohir.A11G234500.1
						GhCSLE_13	Gohir.D11G245700.1
						GhCSLE_09	Gohir.A13G165900.1
						GhCSLE_10	Gohir.D01G076900.1
						GhCSLE_02	Gohir.A01G092500.1
						GhCSLE_07	Gohir.A13G165700.1
						GhCSLE_16	Gohir.D13G168700.1
						GhCSLE_11	Gohir.D01G077000.1
						GhCSLE_03	Gohir.A01G092600.1
						GhCSLG_02	Gohir.A09G189600.1
						GhCSLG_05	Gohir.D09G184300.1
						GhCSLG_04	Gohir.D09G184200.1
						GhCSLG_01	Gohir.A09G189400.1
						GhCSLG_03	Gohir.A12G238100.1
						GhCSLG_06	Gohir.D12G239200.1
						GhCSLJ_12	Gohir.D10G150700.1
						GhCSLJ_06	Gohir.A10G115800.1
						GhCSLJ_01	Gohir.A02G036800.1
						GhCSLJ_08	Gohir.D02G043200.1
						GhCSLJ_07	Gohir.D02G042800.1
						GhCSLJ_11	Gohir.D09G226000.1
						GhCSLJ_05	Gohir.A09G224200.1
						GhCSLJ_10	Gohir.D09G225900.1
						GhCSLJ_04	Gohir.A09G224000.1
						GhCSLJ_03	Gohir.A09G223900.1
						GhCSLJ_02	Gohir.A09G223800.1
						GhCSLJ_09	Gohir.D09G225800.1
						GhCSLB_02	Gohir.D11G161300.1
Angiosperms	Monocots	Commelinids	Poales	Poaceae	Zea mays	ZmCesA-1	AF200525	GenBank (www.ncbi.nlm.nih.gov/genbank/)
						ZmCesA-2	AF200526
						ZmCesA-3	AF200527
						ZmCesA-4	AF200528
						ZmCesA-5	AF200529
						ZmCesA-6	AF200530
						ZmCesA-7	AF200531
						ZmCesA-8	AF200532
						ZmCesA-9	AF200533
						ZmCesA-10	AY372244
						ZmCesA-11	AY372245
						ZmCesA-12	AY372246
						ZmCSLA1-1	NP_001131007.1
						ZmCSLA1-2	NP_001183100.1
						ZmCSLA2-1	XP_008664977.2
						ZmCSLA2-2	XP_008664978.2
						ZmCSLA3-1	XP_008649262.1
						ZmCSLA3-2	XP_008649263.1
						ZmCSLA3-3	XP_020395052.1
						ZmCSLA4-1	NP_001130786.1
						ZmCSLA4-2	NP_001347619.1
						ZmCSLA6-1	NP_001132315.1
						ZmCSLA6-2	XP_008657506.1
						ZmCSLA6-3	XP_008681194.1
						ZmCSLA6-4	XP_020398689.1
						ZmCSLA7-1	XP_008653381.1
						ZmCSLA7-2	XP_020396877.1
						ZmCSLA9	XP_008659807.1
						ZmCSLA11-1	NP_001136470.1
						ZmCSLA11-2	NP_001183513.2
						ZmCSLA11-3	NP_001346969.1
						ZmCSLC1-1	NP_001169244.2
						ZmCSLC1-2	XP_008657194.1
						ZmCSLC2-1	NP_001335706.1
						ZmCSLC2-2	XP_008650958.1
						ZmCSLC3-1	NP_001141327.1
						ZmCSLC3-2	XP_008644464.1
						ZmCSLC3-3	XP_008662691.2
						ZmCSLC3-4	NP_001347177.1
						ZmCSLC3-5	XP_023155870.1
						ZmCSLC7	XP_008649860.1
						ZmCSLC9	NP_001334935.1
						ZmCSLD1	XP_008658791.1
						ZmCSLD2-1	NP_001104955.2
						ZmCSLD2-2	NP_001105236.2
						ZmCSLD2-3	NP_001105621.2
						ZmCSLD2-4	NP_001105672.1
						ZmCSLD2-5	NP_001146633.1
						ZmCSLD2-6	NP_001306681.1
						ZmCSLD2-7	NP_001345017.1
						ZmCSLD3	XP_008664736.1
						ZmCSLD4-1	NP_001136615.1
						ZmCSLD4-2	XP_020405933.1
						ZmCSLD4-3	NP_001346418.1
						ZmCSLD5	XP_008659557.1
						ZmCSLD6	XP_020400201.1
						ZmCSLD7	XP_020393266.1
						ZmCSLE2	XP_020394267.1
						ZmCSLE6	NP_001147894.1
						ZmCSLF1	XP_008653206.1
						ZmCSLF3-1	NP_001147926.1
						ZmCSLF3-2	XP_008671789.1
						ZmCSLF6-1	NP_001308343.1
						ZmCSLF6-2	NP_001315306.1
						ZmCSLF7	XP_008664938.1
						ZmCSLF8-1	XP_008653203.1
						ZmCSLF8-2	XP_008653204.1
						ZmCSLH1-1	XP_008669410.1
						ZmCSLH1-2	XP_008669411.1
Angiosperms	Monocots	Commelinids	Zingiberales	Musaceae	Musa acuminata	MaCesA	Macma4_01_g16970.1	Banana Genome Hub (banana-genome-hub.southgreen.fr/)
						MaCesA	Macma4_07_g02080.1
						MaCesA	Macma4_09_g12590.1
						MaCesA	Macma4_07_g22080.1
						MaCesA	Macma4_05_g16000.1
						MaCesA	Macma4_08_g34110.1
						MaCesA	Macma4_08_g07700.1
						MaCesA	Macma4_09_g05480.1
						MaCesA	Macma4_06_g35100.1
						MaCesA	Macma4_04_g35340.1
						MaCesA	Macma4_04_g35360.1
						MaCesA	Macma4_09_g19610.1
						MaCesA	Macma4_02_g23170.1
						MaCesA	Macma4_05_g06090.1
						MaCesA	Macma4_06_g00620.1
						MaCesA	Macma4_09_g20380.1
						MaCslA1	Ma02_t22150
						MaCslA2	Ma03 t01730
						MaCslA3	Ma05_t18900
						MaCslA4	Ma06_t04300
						MaCslA5	Ma06 t09180
						MaCslA6	Ma06_t14920
						MaCslA7	Ma07_t19410
						MaCslA8	Ma07_t22600
						MaCslA9	Ma09_t27610
						MaCslA10	Ma10_t11450
						MaCslA11	Ma10 t15510
						MaCslA12	Ma10 t18740
						MaCslA13	Ma11_t08690
						MaCslC1	Ma03_t29290
						MaCslC2	Ma04_t02130
						MaCslC3	Ma04_t05930
						MaCslC4	Ma04_t29650
						MaCslC5	Ma04_t38760
						MaCslC6	Ma05_t01870
						MaCslC7	Ma06_t03600
						MaCslC8	Ma06 t29550
						MaCslC9	Ma06_t31890
						MaCslC10	Ma07_t00740
						MaCslC11	Ma07_t20970
						MaCslC12	Ma10_t09350
						MaCslD1	Ma01_t18500
						MaCslD2	Ma02_t07580
						MaCslD3	Ma02_t17080
						MaCslD4	Ma03_t14070
						MaCslD5	Ma03_t25420
						MaCslD6	Ma04_t04560
						MaCslD7	Ma04_t33100
						MaCslD8	Ma10_t26210
						MaCslD9	Ma11_t21750
						MaCslE1	Ma04_t13090
						MaCslE2	Ma09_t20060
						MaCslE3	Ma09_t28670
						MaCslG1	Ma08_t05160
						MaCslG2	Ma08 t05170
						MaCslG3	Ma08_t05180
						MaCslG4	Ma08 t05190
						MaCslH1	Ma09_t08420
Angiosperms	Eudicots	Rosids	Malpighiales	Salicaceae	Populus trichocarpa	PtrCslD	Potri.001G050200.1	The Populus Genome Integrative Explorer v3 (https://popgenie.org)
						PtrCslD	Potri.001G136200.1
						PtrCesA	Potri.001G266400.1
						PtrCslE	Potri.001G369100.1
						PtrCslD	Potri.001G449300.1
						PtrCesA	Potri.002G066600.1
						PtrCslD	Potri.002G200300.1
						PtrCslH	Potri.002G227300.1
						PtrCesA	Potri.002G257900.1
						PtrCslD	Potri.003G097100.1
						PtrCslG	Potri.003G142300.1
						PtrCslG	Potri.003G142400.1
						PtrCslG	Potri.003G142500.1
						PtrCslD	Potri.003G177800.1
						PtrCesA	Potri.004G059600.1
						PtrCslD	Potri.004G208800.1
						PtrCesA	Potri.004G059600.2
						PtrCesA	Potri.005G027600.1
						PtrCesA	Potri.005G087500.1
						PtrCesA	Potri.005G194200.1
						PtrCesE	Potri.006G004200.1
						PtrCesE	Potri.006G004300.1
						PtrCesA	Potri.006G052600.1
						PtrCesA	Potri.006G181900.1
						PtrCesA	Potri.006G251900.1
						PtrCesA	Potri.007G076500.1
						PtrCesA	Potri.009G060800.1
						PtrCslD	Potri.009G170000.1
						PtrCslJ	Potri.010G074700.1
						PtrCslJ	Potri.010G074800.1
						PtrCesA	Potri.011G069600.1
						PtrCesA	Potri.013G019800.1
						PtrCslD	Potri.013G082200.1
						PtrCslH	Potri.014G155300.1
						PtrCslD	Potri.014G125100.1
						PtrCesA	Potri.016G054900.1
						PtrCesA	Potri.018G029400.1
						PtrCslD	Potri.019G049700.1
						PtrCslA	Potri.004G189000.1
						PtrCslA	Potri.009G149700.1
						PtrCslA	Potri.010G234100.1
						PtrCslA	Potri.008G026400.1
						PtrCslA	Potri.006G124300.1
						PtrCslA	Potri.006G116900.1
						PtrCslC	Potri.002G114200.1
						PtrCslC	Potri.002G248400.1
						PtrCslC	Potri.005G146900.1
						PtrCslC	Potri.006G270900.1
						PtrCslC	Potri.014G190700.1
						PtrCslC	Potri.014G190900.1
						PtrCslC	Potri.018G009300.1
