# Supplementary material for: Updating Insights into the Catalytic Domain Properties of Plant Cellulose synthase (CesA) and Cellulose synthase-like (Csl) Proteins
Source: Molecules. 2021 Jul 17;26(14):4335. doi: 10.3390/molecules26144335 (PMC8306620; doi:10.3390/molecules26144335)
Supplement: Supplementary file 1 [file molecules-26-04335-s001.zip › Table_S3.xls]

## Sheet: Table S3A
Table S3. Amino acid sequence similarity between CesA ans Csl proteins. (A) Percentage of exact matches between whole proteins.
	ATCESA1	ATCESA10	OSCESA1	OSCESA2	OSCESA8	ATCESA3	ATCESA2	ATCESA9	ATCESA5	ATCESA6	OSCESA3	OSCESA5	OSCESA6	ATCESA7	OSCESA9	ATCESA4	OSCESA7	ATCESA8	OSCESA4	OSCESA11	OSCESA10	OSCSLF7	OSCSFL1	OSCSLF2	OSCSLF4	OSCSFL8	OSCSLF9	OSCSLF3	OSCSLF6	OSCSLD1	OSCSLD2	ATCSLD2	ATCSLD3	ATCSLD4	OSCSLD3	ATCSLD1	OSCSLD5	ATCSLD5	OSCSLD4	ATCSLB3	ATCSLB4	ATCSLB2	ATCSLB1	ATCSLB5	ATCSLB6	OSCSLH1	OSCSLH3	OSCSLH2	OSCSLE1
ATCESA1		0.83	0.79	0.65	0.65	0.65	0.61	0.6	0.61	0.61	0.64	0.64	0.63	0.61	0.61	0.58	0.58	0.56	0.56	0.38	0.11	0.27	0.26	0.26	0.27	0.27	0.27	0.26	0.28	0.33	0.33	0.33	0.33	0.33	0.32	0.34	0.32	0.33	0.31	0.2	0.2	0.21	0.19	0.2	0.2	0.22	0.19	0.19	0.19
ATCESA10			0.76	0.64	0.64	0.64	0.58	0.58	0.58	0.58	0.61	0.61	0.6	0.57	0.58	0.56	0.56	0.54	0.55	0.38	0.11	0.27	0.26	0.26	0.26	0.27	0.26	0.26	0.28	0.33	0.33	0.33	0.34	0.33	0.32	0.34	0.32	0.33	0.31	0.2	0.2	0.21	0.2	0.2	0.2	0.21	0.19	0.19	0.2
OSCESA1				0.68	0.68	0.67	0.62	0.62	0.63	0.62	0.64	0.64	0.63	0.61	0.62	0.59	0.59	0.58	0.58	0.4	0.12	0.27	0.26	0.27	0.27	0.28	0.27	0.26	0.28	0.33	0.33	0.34	0.34	0.33	0.32	0.34	0.33	0.33	0.31	0.2	0.2	0.2	0.19	0.19	0.2	0.21	0.19	0.19	0.2
OSCESA2					0.91	0.78	0.59	0.58	0.6	0.59	0.63	0.63	0.62	0.62	0.62	0.6	0.59	0.57	0.57	0.38	0.12	0.28	0.26	0.26	0.26	0.27	0.26	0.26	0.29	0.34	0.35	0.35	0.35	0.34	0.33	0.34	0.33	0.34	0.31	0.21	0.21	0.21	0.2	0.2	0.2	0.21	0.19	0.2	0.2
OSCESA8						0.79	0.59	0.59	0.6	0.59	0.63	0.63	0.62	0.63	0.63	0.6	0.59	0.56	0.56	0.38	0.12	0.28	0.26	0.26	0.26	0.27	0.26	0.25	0.29	0.35	0.35	0.35	0.35	0.35	0.34	0.35	0.33	0.34	0.31	0.21	0.2	0.21	0.2	0.2	0.2	0.21	0.19	0.2	0.2
ATCESA3							0.58	0.58	0.59	0.59	0.63	0.62	0.62	0.62	0.63	0.6	0.59	0.57	0.56	0.38	0.12	0.28	0.26	0.27	0.27	0.28	0.27	0.26	0.29	0.34	0.34	0.34	0.34	0.34	0.33	0.35	0.33	0.34	0.32	0.21	0.21	0.21	0.2	0.2	0.2	0.22	0.19	0.2	0.2
ATCESA2								0.87	0.83	0.84	0.69	0.69	0.7	0.62	0.64	0.57	0.57	0.53	0.54	0.36	0.12	0.27	0.26	0.27	0.27	0.27	0.27	0.26	0.28	0.33	0.33	0.33	0.34	0.33	0.32	0.33	0.32	0.33	0.31	0.19	0.19	0.2	0.18	0.19	0.19	0.2	0.17	0.18	0.2
ATCESA9									0.81	0.82	0.68	0.68	0.69	0.62	0.62	0.57	0.57	0.54	0.54	0.35	0.12	0.27	0.26	0.26	0.26	0.27	0.26	0.26	0.28	0.33	0.33	0.33	0.34	0.32	0.32	0.33	0.32	0.33	0.31	0.18	0.19	0.19	0.18	0.18	0.19	0.2	0.17	0.19	0.2
ATCESA5										0.9	0.7	0.69	0.7	0.62	0.63	0.58	0.58	0.54	0.54	0.37	0.12	0.27	0.27	0.27	0.27	0.27	0.27	0.27	0.28	0.34	0.34	0.34	0.34	0.33	0.33	0.33	0.32	0.34	0.32	0.2	0.2	0.2	0.19	0.2	0.2	0.22	0.18	0.2	0.2
ATCESA6											0.7	0.7	0.7	0.62	0.63	0.57	0.57	0.53	0.54	0.36	0.12	0.27	0.26	0.27	0.27	0.26	0.27	0.27	0.28	0.33	0.33	0.34	0.33	0.32	0.32	0.33	0.32	0.34	0.32	0.19	0.19	0.2	0.18	0.19	0.19	0.2	0.18	0.18	0.2
OSCESA3												0.95	0.9	0.66	0.68	0.6	0.6	0.55	0.57	0.35	0.12	0.27	0.26	0.26	0.26	0.27	0.26	0.26	0.29	0.34	0.34	0.34	0.34	0.34	0.32	0.34	0.33	0.34	0.32	0.19	0.19	0.2	0.19	0.19	0.19	0.21	0.18	0.18	0.2
OSCESA5													0.9	0.66	0.68	0.59	0.59	0.55	0.56	0.36	0.12	0.27	0.26	0.26	0.26	0.27	0.26	0.26	0.28	0.34	0.34	0.34	0.34	0.33	0.32	0.33	0.33	0.33	0.32	0.19	0.19	0.2	0.19	0.19	0.19	0.21	0.18	0.18	0.2
OSCESA6														0.65	0.67	0.59	0.59	0.55	0.56	0.35	0.12	0.27	0.26	0.26	0.26	0.27	0.26	0.26	0.28	0.34	0.34	0.34	0.34	0.34	0.32	0.34	0.33	0.34	0.32	0.19	0.19	0.2	0.19	0.19	0.19	0.21	0.18	0.18	0.2
ATCESA7															0.8	0.6	0.6	0.57	0.57	0.37	0.12	0.28	0.27	0.27	0.27	0.28	0.28	0.27	0.28	0.34	0.34	0.34	0.34	0.34	0.33	0.34	0.33	0.34	0.32	0.21	0.21	0.21	0.2	0.21	0.21	0.22	0.19	0.2	0.21
OSCESA9																0.6	0.6	0.57	0.56	0.37	0.12	0.29	0.27	0.28	0.27	0.28	0.28	0.27	0.29	0.35	0.35	0.35	0.35	0.35	0.33	0.35	0.34	0.34	0.32	0.2	0.2	0.2	0.19	0.19	0.2	0.22	0.19	0.2	0.21
ATCESA4																	0.75	0.61	0.6	0.37	0.12	0.28	0.27	0.27	0.27	0.28	0.27	0.26	0.28	0.34	0.33	0.34	0.34	0.33	0.32	0.34	0.33	0.33	0.31	0.21	0.21	0.21	0.2	0.2	0.2	0.22	0.19	0.2	0.21
OSCESA7																		0.6	0.59	0.37	0.12	0.29	0.26	0.27	0.27	0.28	0.27	0.27	0.28	0.34	0.33	0.33	0.33	0.33	0.32	0.33	0.33	0.33	0.32	0.2	0.2	0.2	0.2	0.2	0.19	0.22	0.19	0.2	0.2
ATCESA8																			0.73	0.39	0.13	0.31	0.28	0.28	0.28	0.29	0.28	0.27	0.3	0.33	0.33	0.33	0.33	0.33	0.31	0.34	0.33	0.33	0.31	0.22	0.22	0.22	0.21	0.22	0.22	0.24	0.2	0.22	0.22
OSCESA4																				0.4	0.13	0.3	0.28	0.28	0.28	0.29	0.29	0.28	0.3	0.34	0.34	0.33	0.33	0.34	0.32	0.35	0.34	0.34	0.32	0.22	0.22	0.22	0.21	0.21	0.22	0.23	0.2	0.22	0.22
OSCESA11																					0.13	0.29	0.26	0.26	0.26	0.25	0.26	0.24	0.26	0.26	0.25	0.26	0.26	0.25	0.24	0.27	0.27	0.25	0.25	0.22	0.22	0.22	0.21	0.22	0.22	0.23	0.21	0.21	0.22
OSCESA10																						0.33	0.19	0.18	0.18	0.18	0.18	0.17	0.16	0.13	0.13	0.13	0.13	0.13	0.12	0.13	0.13	0.13	0.13	0.11	0.11	0.1	0.1	0.1	0.1	0.12	0.1	0.09	0.12
OSCSLF7																							0.42	0.41	0.4	0.39	0.41	0.38	0.39	0.32	0.31	0.31	0.31	0.31	0.3	0.32	0.33	0.3	0.3	0.22	0.22	0.22	0.22	0.21	0.21	0.26	0.22	0.22	0.23
OSCSFL1																								0.93	0.82	0.57	0.56	0.54	0.45	0.33	0.33	0.32	0.33	0.33	0.32	0.35	0.34	0.32	0.32	0.22	0.22	0.21	0.21	0.21	0.22	0.24	0.2	0.22	0.21
OSCSLF2																									0.84	0.57	0.56	0.54	0.45	0.34	0.34	0.33	0.33	0.33	0.33	0.35	0.35	0.32	0.32	0.21	0.21	0.21	0.2	0.2	0.21	0.24	0.2	0.21	0.2
OSCSLF4																										0.56	0.56	0.55	0.46	0.34	0.34	0.33	0.33	0.34	0.33	0.35	0.35	0.32	0.33	0.21	0.21	0.21	0.2	0.2	0.21	0.23	0.19	0.21	0.2
OSCSFL8																											0.66	0.55	0.45	0.34	0.33	0.32	0.32	0.33	0.31	0.34	0.35	0.32	0.31	0.2	0.2	0.21	0.21	0.2	0.21	0.23	0.2	0.21	0.2
OSCSLF9																												0.54	0.45	0.32	0.32	0.31	0.31	0.32	0.31	0.33	0.34	0.31	0.31	0.21	0.22	0.22	0.21	0.21	0.21	0.24	0.21	0.22	0.21
OSCSLF3																													0.44	0.33	0.32	0.31	0.31	0.32	0.31	0.33	0.34	0.31	0.3	0.2	0.2	0.2	0.19	0.19	0.19	0.24	0.2	0.21	0.2
OSCSLF6																														0.38	0.37	0.38	0.38	0.37	0.36	0.38	0.39	0.35	0.35	0.2	0.2	0.2	0.2	0.2	0.19	0.23	0.19	0.2	0.2
OSCSLD1																															0.73	0.74	0.74	0.64	0.61	0.58	0.55	0.57	0.55	0.18	0.18	0.18	0.18	0.18	0.18	0.2	0.17	0.18	0.18
OSCSLD2																																0.77	0.78	0.67	0.65	0.57	0.54	0.59	0.56	0.17	0.18	0.18	0.17	0.17	0.18	0.2	0.17	0.18	0.17
ATCSLD2																																	0.88	0.67	0.65	0.59	0.55	0.59	0.56	0.18	0.18	0.18	0.17	0.17	0.18	0.2	0.17	0.18	0.18
ATCSLD3																																		0.68	0.65	0.59	0.55	0.59	0.56	0.17	0.18	0.18	0.18	0.18	0.18	0.2	0.17	0.18	0.18
ATCSLD4																																			0.71	0.6	0.55	0.55	0.52	0.17	0.17	0.18	0.18	0.17	0.17	0.2	0.17	0.19	0.18
OSCSLD3																																				0.58	0.54	0.54	0.51	0.18	0.18	0.18	0.17	0.17	0.18	0.2	0.18	0.18	0.18
ATCSLD1																																					0.66	0.53	0.49	0.19	0.19	0.2	0.19	0.18	0.19	0.21	0.18	0.2	0.19
OSCSLD5																																						0.5	0.48	0.2	0.19	0.2	0.19	0.19	0.19	0.22	0.19	0.2	0.19
ATCSLD5																																							0.67	0.17	0.17	0.17	0.17	0.17	0.17	0.2	0.16	0.17	0.18
OSCSLD4																																								0.17	0.17	0.17	0.17	0.17	0.17	0.19	0.16	0.17	0.17
ATCSLB3																																									0.85	0.8	0.76	0.74	0.75	0.4	0.34	0.32	0.28
ATCSLB4																																										0.77	0.73	0.73	0.74	0.42	0.35	0.34	0.28
ATCSLB2																																											0.78	0.75	0.76	0.39	0.34	0.32	0.25
ATCSLB1																																												0.74	0.73	0.38	0.34	0.32	0.26
ATCSLB5																																													0.87	0.38	0.33	0.32	0.26
ATCSLB6																																														0.39	0.34	0.32	0.27
OSCSLH1																																															0.64	0.63	0.26
OSCSLH3																																																0.56	0.24
OSCSLH2																																																	0.24
OSCSLE1
OSCSLE6
OSCSLE2
ATCSLE1
ATCSLG1
ATCSLG2
ATCSLG3
ATCSLA10
ATCSLA11
ATCSLA15
ATCSLA1
ATCSLA2
ATCSLA9
OSCSLA1
OSCSLA9
ATCSLA7
ATCSLA3
ATCSLA14
OSCSLA2
OSCSLA4
OSCSLA3
OSCSLA11
OSCSLA6
OSCSLA5
OSCSLA7
ATCSLC5
ATCSLC8
OSCSLC3
OSCSLC2
ATCSLC4
OSCSLC1
OSCSLC7
OSCSLC9
OSCSLC10
ATCSLC12
ATCSLC6
[truncated: 35 more columns]

## Sheet: Table S3B
Table S3. Amino acid sequence similarity between CesA ans Csl proteins. (B) Percentage of exact matches between the catalytic domain.
	ATCSLB3	ATCSLB4	ATCSLB2	ATCSLB1	ATCSLB5	ATCSLB6	OSCSLH1	OSCSLH3	OSCSLH2	ATCSLD1	OSCSLD5	ATCSLD4	OSCSLD3	ATCSLD2	ATCSLD3	OSCSLD2	OSCSLD1	ATCSLD5	OSCSLD4	ATCSLD6	OSCSLF1	OSCSLF2	OSCSLF4	OSCSFL8	OSCSLF9	OSCSLF3	OSCSLF6	OSCSLF7	OSCESA10	ATCESA4	OSCESA7	ATCESA8	OSCESA4	ATCESA7	OSCESA9	ATCESA1	ATCESA10	OSCESA1	OSCESA2	OSCESA8	ATCESA3	ATCESA2	ATCESA9	ATCESA5	ATCESA6	OSCESA3	OSCESA5	OSCESA6	OSCESA11
ATCSLB3		0.86	0.84	0.79	0.78	0.81	0.44	0.35	0.35	0.27	0.27	0.28	0.29	0.28	0.28	0.28	0.27	0.28	0.26	0.26	0.29	0.29	0.3	0.3	0.29	0.3	0.27	0.3	0.18	0.3	0.28	0.31	0.31	0.33	0.32	0.31	0.31	0.31	0.31	0.31	0.31	0.29	0.29	0.31	0.3	0.31	0.31	0.31	0.28
ATCSLB4			0.79	0.76	0.76	0.79	0.46	0.35	0.36	0.26	0.26	0.27	0.28	0.28	0.27	0.27	0.27	0.26	0.26	0.26	0.29	0.29	0.3	0.29	0.29	0.29	0.26	0.31	0.18	0.3	0.28	0.31	0.31	0.33	0.32	0.31	0.31	0.3	0.31	0.31	0.3	0.29	0.29	0.3	0.3	0.3	0.3	0.3	0.28
ATCSLB2				0.8	0.78	0.8	0.44	0.36	0.35	0.25	0.26	0.27	0.28	0.28	0.27	0.27	0.27	0.27	0.26	0.26	0.28	0.28	0.29	0.29	0.3	0.29	0.27	0.3	0.17	0.3	0.28	0.31	0.31	0.32	0.32	0.31	0.31	0.3	0.3	0.3	0.31	0.29	0.29	0.3	0.31	0.3	0.31	0.31	0.27
ATCSLB1					0.76	0.78	0.43	0.35	0.35	0.25	0.26	0.26	0.28	0.27	0.27	0.26	0.26	0.26	0.26	0.26	0.28	0.28	0.29	0.28	0.29	0.28	0.27	0.3	0.17	0.3	0.28	0.31	0.31	0.31	0.31	0.31	0.3	0.3	0.3	0.3	0.31	0.29	0.29	0.3	0.3	0.3	0.3	0.3	0.27
ATCSLB5						0.92	0.44	0.36	0.36	0.25	0.26	0.26	0.27	0.27	0.27	0.26	0.26	0.26	0.25	0.26	0.28	0.28	0.29	0.29	0.29	0.28	0.26	0.29	0.17	0.3	0.28	0.3	0.31	0.32	0.31	0.31	0.31	0.3	0.3	0.3	0.31	0.3	0.3	0.31	0.3	0.3	0.3	0.3	0.27
ATCSLB6							0.45	0.36	0.36	0.25	0.27	0.27	0.27	0.28	0.27	0.27	0.27	0.27	0.26	0.26	0.29	0.29	0.3	0.29	0.29	0.29	0.26	0.29	0.17	0.3	0.27	0.3	0.31	0.32	0.32	0.31	0.31	0.3	0.3	0.3	0.3	0.3	0.3	0.31	0.3	0.3	0.31	0.3	0.27
OSCSLH1								0.61	0.65	0.29	0.29	0.3	0.31	0.3	0.3	0.3	0.3	0.3	0.3	0.29	0.34	0.34	0.34	0.32	0.32	0.32	0.31	0.36	0.2	0.31	0.29	0.33	0.32	0.34	0.35	0.32	0.32	0.32	0.33	0.33	0.33	0.31	0.32	0.32	0.31	0.32	0.32	0.31	0.29
OSCSLH3									0.54	0.22	0.24	0.24	0.26	0.24	0.25	0.25	0.24	0.24	0.24	0.24	0.26	0.26	0.27	0.27	0.26	0.27	0.25	0.29	0.17	0.25	0.24	0.26	0.26	0.27	0.28	0.26	0.26	0.26	0.26	0.27	0.27	0.25	0.25	0.26	0.25	0.26	0.26	0.25	0.24
OSCSLH2										0.26	0.26	0.28	0.28	0.27	0.28	0.28	0.27	0.27	0.26	0.26	0.3	0.3	0.3	0.3	0.29	0.29	0.27	0.32	0.16	0.28	0.27	0.3	0.29	0.3	0.31	0.29	0.29	0.29	0.29	0.3	0.29	0.28	0.29	0.29	0.28	0.28	0.28	0.27	0.26
ATCSLD1											0.71	0.71	0.68	0.7	0.7	0.68	0.67	0.66	0.63	0.61	0.44	0.44	0.44	0.44	0.44	0.42	0.48	0.4	0.24	0.4	0.38	0.41	0.42	0.42	0.43	0.42	0.42	0.42	0.43	0.43	0.42	0.42	0.42	0.42	0.42	0.42	0.42	0.42	0.34
OSCSLD5												0.67	0.68	0.66	0.66	0.66	0.65	0.63	0.61	0.59	0.43	0.43	0.44	0.44	0.43	0.43	0.46	0.4	0.24	0.38	0.37	0.39	0.4	0.4	0.41	0.39	0.38	0.38	0.4	0.39	0.4	0.39	0.4	0.4	0.39	0.41	0.41	0.41	0.32
ATCSLD4													0.78	0.72	0.73	0.73	0.71	0.66	0.63	0.64	0.46	0.46	0.47	0.48	0.47	0.46	0.49	0.43	0.26	0.42	0.41	0.44	0.44	0.43	0.45	0.43	0.43	0.44	0.43	0.44	0.44	0.43	0.43	0.43	0.43	0.43	0.43	0.43	0.34
OSCSLD3														0.71	0.72	0.72	0.69	0.66	0.63	0.62	0.47	0.47	0.47	0.47	0.47	0.45	0.49	0.42	0.25	0.4	0.39	0.42	0.43	0.42	0.43	0.41	0.41	0.42	0.42	0.43	0.42	0.42	0.43	0.43	0.42	0.42	0.41	0.42	0.33
ATCSLD2															0.91	0.85	0.81	0.68	0.67	0.67	0.46	0.46	0.48	0.47	0.46	0.44	0.51	0.44	0.27	0.43	0.41	0.44	0.45	0.45	0.45	0.43	0.43	0.44	0.45	0.45	0.44	0.44	0.43	0.44	0.43	0.44	0.43	0.44	0.35
ATCSLD3																0.85	0.81	0.7	0.68	0.68	0.46	0.46	0.47	0.47	0.45	0.45	0.51	0.44	0.27	0.43	0.41	0.44	0.45	0.45	0.45	0.43	0.43	0.44	0.45	0.45	0.44	0.44	0.43	0.44	0.43	0.43	0.43	0.44	0.35
OSCSLD2																	0.81	0.69	0.68	0.68	0.47	0.47	0.48	0.49	0.46	0.45	0.51	0.44	0.27	0.42	0.41	0.44	0.45	0.45	0.45	0.43	0.43	0.44	0.45	0.45	0.44	0.43	0.43	0.44	0.43	0.44	0.44	0.44	0.35
OSCSLD1																		0.67	0.67	0.66	0.46	0.46	0.47	0.48	0.45	0.46	0.5	0.44	0.27	0.42	0.41	0.44	0.44	0.43	0.44	0.42	0.42	0.43	0.44	0.44	0.43	0.42	0.42	0.43	0.42	0.43	0.42	0.42	0.35
ATCSLD5																			0.79	0.64	0.46	0.46	0.45	0.46	0.45	0.43	0.48	0.43	0.26	0.42	0.4	0.43	0.45	0.43	0.44	0.43	0.43	0.43	0.44	0.44	0.44	0.44	0.44	0.44	0.44	0.44	0.44	0.45	0.34
OSCSLD4																				0.62	0.45	0.45	0.47	0.45	0.45	0.43	0.48	0.43	0.26	0.4	0.39	0.43	0.43	0.42	0.42	0.41	0.4	0.41	0.42	0.41	0.42	0.42	0.42	0.43	0.42	0.42	0.42	0.42	0.36
ATCSLD6																					0.44	0.44	0.45	0.45	0.45	0.44	0.48	0.42	0.26	0.41	0.4	0.43	0.44	0.44	0.44	0.42	0.42	0.42	0.44	0.43	0.44	0.42	0.42	0.43	0.42	0.43	0.43	0.43	0.34
OSCSLF1																						1	0.85	0.68	0.65	0.61	0.54	0.52	0.33	0.37	0.35	0.38	0.38	0.39	0.4	0.36	0.36	0.37	0.38	0.37	0.38	0.38	0.38	0.38	0.38	0.37	0.38	0.37	0.33
OSCSLF2																							0.85	0.68	0.65	0.61	0.54	0.52	0.33	0.37	0.35	0.38	0.38	0.39	0.4	0.36	0.36	0.37	0.38	0.37	0.38	0.38	0.38	0.38	0.38	0.37	0.38	0.37	0.33
OSCSLF4																								0.67	0.65	0.62	0.55	0.51	0.33	0.37	0.35	0.39	0.38	0.39	0.4	0.37	0.37	0.37	0.38	0.38	0.38	0.39	0.38	0.39	0.37	0.38	0.38	0.38	0.33
OSCSFL8																									0.75	0.64	0.54	0.49	0.31	0.37	0.36	0.39	0.39	0.4	0.41	0.38	0.38	0.39	0.39	0.39	0.39	0.39	0.39	0.38	0.38	0.39	0.39	0.38	0.33
OSCSLF9																										0.6	0.54	0.5	0.32	0.37	0.36	0.4	0.39	0.4	0.41	0.38	0.37	0.39	0.38	0.38	0.39	0.39	0.39	0.39	0.39	0.39	0.38	0.38	0.33
OSCSLF3																											0.53	0.45	0.29	0.34	0.33	0.37	0.36	0.36	0.38	0.35	0.35	0.36	0.36	0.35	0.35	0.37	0.36	0.37	0.37	0.36	0.36	0.36	0.3
OSCSLF6																												0.48	0.3	0.37	0.36	0.39	0.39	0.37	0.39	0.38	0.38	0.38	0.4	0.4	0.4	0.39	0.38	0.39	0.38	0.39	0.38	0.38	0.33
OSCSLF7																													0.58	0.38	0.37	0.41	0.41	0.41	0.43	0.39	0.39	0.4	0.4	0.4	0.4	0.4	0.4	0.4	0.4	0.4	0.4	0.4	0.35
OSCESA10																														0.23	0.23	0.25	0.25	0.25	0.26	0.24	0.23	0.25	0.24	0.24	0.24	0.25	0.24	0.25	0.25	0.25	0.25	0.24	0.22
ATCESA4																															0.78	0.7	0.71	0.68	0.68	0.68	0.67	0.69	0.7	0.71	0.7	0.68	0.67	0.67	0.66	0.69	0.68	0.68	0.49
OSCESA7																																0.69	0.7	0.66	0.67	0.67	0.66	0.68	0.68	0.68	0.67	0.67	0.67	0.66	0.67	0.68	0.68	0.67	0.47
ATCESA8																																	0.84	0.72	0.73	0.71	0.7	0.72	0.73	0.73	0.74	0.69	0.68	0.68	0.67	0.71	0.7	0.71	0.51
OSCESA4																																		0.72	0.73	0.74	0.72	0.74	0.74	0.74	0.73	0.72	0.72	0.69	0.7	0.73	0.73	0.73	0.52
ATCESA7																																			0.86	0.7	0.68	0.71	0.74	0.75	0.74	0.69	0.68	0.68	0.68	0.71	0.7	0.71	0.5
OSCESA9																																				0.72	0.7	0.73	0.75	0.76	0.74	0.72	0.71	0.69	0.7	0.73	0.73	0.72	0.5
ATCESA1																																					0.92	0.89	0.79	0.78	0.76	0.72	0.7	0.69	0.7	0.71	0.71	0.71	0.54
ATCESA10																																						0.87	0.78	0.78	0.75	0.71	0.7	0.69	0.69	0.71	0.7	0.7	0.54
OSCESA1																																							0.81	0.8	0.76	0.73	0.72	0.71	0.71	0.72	0.71	0.71	0.55
OSCESA2																																								0.94	0.88	0.72	0.7	0.72	0.72	0.74	0.74	0.74	0.53
OSCESA8																																									0.89	0.73	0.7	0.71	0.71	0.74	0.74	0.73	0.53
ATCESA3																																										0.7	0.69	0.7	0.7	0.74	0.72	0.72	0.52
ATCESA2																																											0.89	0.87	0.88	0.78	0.78	0.79	0.51
ATCESA9																																												0.85	0.85	0.78	0.77	0.78	0.5
ATCESA5																																													0.92	0.77	0.77	0.78	0.51
ATCESA6																																														0.77	0.77	0.77	0.5
OSCESA3																																															0.96	0.94	0.49
OSCESA5																																																0.93	0.5
OSCESA6																																																	0.5
OSCESA11
OSCSLE1
OSCSLE6
OSCSLE2
ATCSLE1
ATCSLG1
ATCSLG3
ATCSLG2
ATCSLA11
ATCSLA15
ATCSLA10
ATCSLA1
ATCSLA7
ATCSLA3
ATCSLA14
ATCSLA2
ATCSLA9
OSCSLA1
OSCSLA9
OSCSLA11
OSCSLA3
OSCSLA2
OSCSLA4
OSCSLA5
OSCSLA7
OSCSLA6
ATCSLC5
ATCSLC8
OSCSLC2
OSCSLC3
ATCSLC4
OSCSLC1
OSCSLC7
OSCSLC9
OSCSLC10
ATCSLC12
ATCSLC6
[truncated: 36 more columns]
