# Supplementary material for: Updating Insights into the Catalytic Domain Properties of Plant Cellulose synthase (CesA) and Cellulose synthase-like (Csl) Proteins
Source: Molecules. 2021 Jul 17;26(14):4335. doi: 10.3390/molecules26144335 (PMC8306620; doi:10.3390/molecules26144335)
Supplement: Supplementary file 1 [file molecules-26-04335-s001.zip › Table_S4.pdf]

**Table S4.** Inventory of *Arabidopsis* and rice cellulose synthase (*cesa*) mutant alleles

| Gene             | CesA           | Allele            | Mutation   | Phenotype                                                                                                                                                                       | Reference       |
|------------------|----------------|-------------------|------------|---------------------------------------------------------------------------------------------------------------------------------------------------------------------------------|-----------------|
| <i>At4g32410</i> | <i>AtCESA1</i> | <i>rsw1-1</i>     | A(549)V    | Root swelling, stunted growth (heat, temperature sensitive)                                                                                                                     | [1]             |
|                  |                | <i>rsw1-20</i>    | D(780)N    | Swollen root, abnormal dark morphology, reduced growth of hypocotyls and roots                                                                                                  | [2]             |
|                  |                | <i>rsw1-45</i>    | E(779)K    | Swollen root, abnormal dark morphology, reduced growth of hypocotyls and roots                                                                                                  | [2]             |
|                  |                | <i>rsw1-2</i>     | G(631)S    | Lethality                                                                                                                                                                       | [3]             |
|                  |                | <i>aegeus</i>     | A(903)V    | Quinoxiphen resistant, reduced cellulose content, altered cellulose crystallinity, increased CSC velocity                                                                       | [4]             |
|                  |                | <i>any1</i>       | D(604)N    | Dwarf plants with reduced anisotropic growth of roots, aerial organs, and trichomes                                                                                             | [5]             |
| <i>At5g05170</i> | <i>AtCESA3</i> | <i>ixr1-2</i>     | G(998)D    | Semidominant resistance to isoxaben                                                                                                                                             | [6]             |
|                  |                | <i>cev1</i>       | G(617)E    | Stunted root growth, induction of defense responses                                                                                                                             | [7]             |
|                  |                | <i>eli1-1</i>     | S(301)F    | Stunted root growth, induction of defense responses                                                                                                                             | [8]             |
|                  |                | <i>eli1-2</i>     | A(522)V    | Stunted root growth, induction of defense responses                                                                                                                             | [8]             |
|                  |                | <i>than</i>       | P(578)S    | Root swelling, stunted growth at permissive temperature, semidominant mutation, lethality                                                                                       | [9]             |
|                  |                | <i>mre1</i>       | G916E      | Short, swollen root and etiolated hypocotyl, cellulose deficiency, dwarf plants                                                                                                 | [10]            |
|                  |                | <i>ixr1-6</i>     | S(377)F    | Isoxaben resistant, decreased cellulose content, cellulose crystallinity and plant height. Ectopic lignin deposition. Swollen roots.                                            | [11,12]<br>[12] |
|                  |                | <i>ixr1-4</i>     |            | Isoxaben resistant, decreased cellulose content, cellulose crystallinity and plant height. Ectopic lignin deposition. Swollen roots.                                            |                 |
| <i>At5g44030</i> | <i>AtCESA4</i> | <i>irx5-3</i>     | Q(263)Stop | Irregular xylem vessels                                                                                                                                                         | [13]            |
| <i>At5g64740</i> | <i>AtCESA6</i> | <i>prc1-1/1-3</i> | Q(720)Stop | Reduced growth of dark-grown hypocotyls and roots (many alleles), root hair henotype                                                                                            | [14,15]         |
|                  |                | <i>prc1-4/1-5</i> | W(777)Stop | Reduced growth of dark-grown hypocotyls and roots                                                                                                                               | [15]            |
|                  |                | <i>prc1-9</i>     | K(722)S    | Reduced growth of dark-grown hypocotyls and roots                                                                                                                               | [16]            |
|                  |                | <i>prc1-20</i>    |            | Oryzalin hypersensitive, isoxaben hypersensitive, short, swollen etiolated hypocotyls and roots, cellulose content deficiency                                                   |                 |
|                  |                | <i>es20r4</i>     | D(605)N    | Reduced sensitivity to Endosidin20, less long roots                                                                                                                             | [17]            |
|                  |                | <i>es20r10</i>    | P(595)S    | Reduced sensitivity to Endosidin20, long roots                                                                                                                                  | [17]            |
|                  |                | <i>es20r11</i>    | D(396)N    | Reduced sensitivity to Endosidin20, long roots                                                                                                                                  | [17]            |
| <i>At5g17420</i> | <i>AtCESA7</i> | <i>fra5</i>       | P(557)T    | Fragile fibers, weak stem, extremely thin fiber walls, semidominant mutation                                                                                                    | [18]            |
|                  |                | <i>mur10-1</i>    | W(444)Stop | Reduction in growth and dark-green coloration of the aerial parts                                                                                                               | [19]            |
|                  |                | <i>mur10-2</i>    | H(734)Y    | Reduction in growth and dark-green coloration of the aerial parts                                                                                                               | [19]            |
|                  |                | <i>irx3</i>       | W(589)Stop | Irregular xylem. Low levels of crystalline cellulose and collapsed xylem cells                                                                                                  | [20,21]         |
| <i>At4g18780</i> | <i>CESA8</i>   | <i>irx1-1</i>     | D(683)N    | Weak stem, collapsed xylem vessels                                                                                                                                              | [22]            |
|                  |                | <i>irx1-2</i>     | S(679)L    | Weak stem, collapsed xylem vessels                                                                                                                                              | [22]            |
|                  |                | <i>fra6</i>       | R(362)K    | Reduced fiber wall thickness                                                                                                                                                    | [18]            |
|                  |                | <i>exi1-2</i>     | G(508)E    | Small rosette leaves, flowers, siliques, reduced cell elongation, dwarf plants, altered vasculature and cell morphology, cellulose content deficiency, impaired water transport | [23]            |

| Gene                         | Cesa         | Allele        | Mutation                              | Phenotype                                                                                                   | Reference |
|------------------------------|--------------|---------------|---------------------------------------|-------------------------------------------------------------------------------------------------------------|-----------|
| <i>Os01g54620</i>            | <i>CESA4</i> | <i>bc11</i>   | G(858)R                               | Reduced mechanical strength in the culms and leaves, abnormal growth, dwarfism, withered leaf tips          | [24]      |
|                              |              | <i>fc17</i>   | F(426)S                               | Brittleness, reduced extension force but no significant reduction in breaking force of basal stem internode | [25]      |
|                              |              |               |                                       |                                                                                                             |           |
| <i>Os09g25490</i>            | <i>CESA9</i> | <i>bc88</i>   | P(421)L                               | Brittle phenotype with pleiotropic phenotypes, withered                                                     | [26]      |
|                              |              | <i>bc6</i>    | R588G                                 | leaf tips                                                                                                   | [27]      |
|                              |              | <i>osfc16</i> | W <sup>481</sup> P <sup>482</sup> GN→ | Brittle phenotype but no pleiotropic phenotypes, culms and leaves easily broke                              | [25]      |
|                              |              |               | C <sup>481</sup> S <sup>482</sup> GN  | Normal plant growth and high biomass production                                                             |           |
|                              |              | <i>sdbc1</i>  | D387N                                 |                                                                                                             | [28]      |
| Mild brittle culm phenotypes |              |               |                                       |                                                                                                             |           |

## References

- Arioli, T.; Peng, L.; Betzner, A. S.; Burn, J.; Wittke, W.; Herth, W.; Camilleri, C.; Höfte, H.; Plazinski, J.; Birch, R.; Cork, A.; Glover, J.; Redmond, J.; Williamson, R. E.. Molecular analysis of cellulose biosynthesis in Arabidopsis. *Science* **1998**, 279, 717-720.
- Beeckman, T.; Przemeck, G. K.; Stamatiou, G.; Lau, R.; Terryn, N.; De Rycke, R.; Inzé, D.; Berleth, T.. Genetic complexity of cellulose synthase A gene function in Arabidopsis embryogenesis. *Plant Physiol* **2002**, 130, 1883-1893.
- Gillmor, C. S; Poindexter, P.; Lorieau, J.; Palcic, M. M.; Somerville, C.  $\alpha$ -Glucosidase I is required for cellulose biosynthesis and morphogenesis in Arabidopsis. *J Cell Biol* **2002**, 156, 1003-1013.
- Harris, D. M.; Corbin, K.; Wang, T.; Gutierrez, R.; Bertolo, A. L.; Petti, C.; Smilgies, D. M.; Estevez, J. M.; Bonetta, D.; Urbanowicz, B. R.; Ehrhardt, D. W.; Somerville, C. R.; Rose, J. K. C.; Hong, M.; DeBolt, S. Cellulose microfibril crystallinity is reduced by mutating C-terminal transmembrane region residues CESA1A903V and CESA3T942I of cellulose synthase. *Proc Natl Acad Sciences USA* **2012**, 109, 4098-4103.
- Fujita, M.; Himmelsbach, R.; Ward, J.; Whittington, A.; Hasenbein, N.; Liu, C.; Truong, T. T.; Galway, M. E.; Mansfield, S. D.; Hocart, C. H.; Wasteneys, G. O. The anisotropy1 D604N mutation in the Arabidopsis cellulose synthase1 catalytic domain reduces cell wall crystallinity and the velocity of cellulose synthase complexes. *Plant Physiol* **2013**, 162, 74-85.
- Scheible, W. R.; Eshed, R.; Richmond, T.; Delmer, D.; Somerville, C. Modifications of cellulose synthase confer resistance to isoxaben and thiazolidinone herbicides in Arabidopsis *lrx1* mutants. *Proc Natl Acad Sci USA* **2001**, 98, 10079-10084.
- Ellis, C.; Karafyllidis, I.; Wasternack, C.; Turner, J. G. The Arabidopsis mutant *cev1* links cell wall signaling to jasmonate and ethylene responses. *Plant Cell* **2002**, 14, 1557-1566.
- Caño-Delgado, A.; Penfield, S.; Smith, C.; Catley, M.; Bevan, M. Reduced cellulose synthesis invokes lignification and defense responses in Arabidopsis thaliana. *Plant J* **2003**, 34, 351-362.

9. Daras, G.; Rigas, S.; Penning, B.; Milioni, D.; McCann, M. C.; Carpita, N. C.; Fasseas, C.; Hatzopoulos, P. The thanatos mutation in *Arabidopsis thaliana* cellulose synthase 3 (AtCesA3) has a dominant-negative effect on cellulose synthesis and plant growth. *New Phytol* **2009**, *184*, 114-126.
10. Pysh, L.; Alexander, N.; Swatzyna, L.; Harbert, R. Four alleles of AtCESA3 form an allelic series with respect to root phenotype in *Arabidopsis thaliana*. *Physiol plant* **2012**, *144*, 369-381.
11. Sethaphong, L.; Davis, J. K.; Slabaugh, E.; Singh, A.; Haigler, C. H.; Yingling, Y. G. Prediction of the structures of the plant-specific regions of vascular plant cellulose synthases and correlated functional analysis. *Cellulose* **2016**, *23*, 145-161.
12. Shim, I.; Law, R.; Kileeg, Z.; Stronghill, P.; Northey, J. G.; Strap, J. L.; Bonetta, D. T. Alleles causing resistance to isoxaben and flupoxam highlight the significance of transmembrane domains for CESA protein function. *Front Plant Sci* **2018**, *9*, 1152.
13. Taylor, N. G.; Howells, R. M.; Huttly, A. K.; Vickers, K.; Turner, S. R. Interactions among three distinct Cesa proteins essential for cellulose synthesis. *Proc Natl Acad Sci USA* **2003**, *100*, 1450-1455.
14. Desnos, T.; Orbovic, V.; Bellini, C.; Kronenberger, J.; Caboche, M.; Traas, J.; Hofte, H. Procuste1 mutants identify two distinct genetic pathways controlling hypocotyl cell elongation, respectively in dark-and light-grown *Arabidopsis* seedlings. *Development* **1996**, *122*, 683-693.
15. Fagard, M.; Desnos, T.; Desprez, T.; Goubet, F.; Refregier, G.; Mouille, G.; McCann, M.; Rayon, C.; Vernhettes, S.; Höfte, H. PROCUSTE1 encodes a cellulose synthase required for normal cell elongation specifically in roots and dark-grown hypocotyls of *Arabidopsis*. *Plant Cell* **2000**, *12*, 2409-2423.
16. Paredez, A. R.; Persson, S.; Ehrhardt, D. W.; Somerville, C. R. Genetic evidence that cellulose synthase activity influences microtubule cortical array organization. *Plant Physiol* **2008**, *147*, 1723-1734.
17. Huang, L.; Li, X.; Zhang, W.; Ung, N.; Liu, N.; Yin, X.; Li, Y.; Mcewan, R. E.; Dilkes, B.; Dai, M.; Hicks, G. R.; Raikhel, N. V.; Staiger, C. J.; Zhang, C. Endosidin20 targets the cellulose synthase catalytic domain to inhibit cellulose biosynthesis. *Plant Cell* **2020**, *32*, 2141-2157.
18. Zhong, R.; Morrison, W. H.; Freshour, G. D.; Hahn, M. G.; Ye, Z. H. Expression of a mutant form of cellulose synthase AtCesA7 causes dominant negative effect on cellulose biosynthesis. *Plant Physiol* **2003**, *132*, 786-795.
19. Bosca, S.; Barton, C. J.; Taylor, N. G.; Ryden, P.; Neumetzler, L.; Pauly, M.; Roberts, K.; Seifert, G. J. Interactions between MUR10/CesA7-dependent secondary cellulose biosynthesis and primary cell wall structure. *Plant physiol* **2006**, *142*, 1353-1363.
20. Taylor, N. G.; Scheible, W. R.; Cutler, S.; Somerville, C. R.; Turner, S. R. The irregular xylem3 locus of *Arabidopsis* encodes a cellulose synthase required for secondary cell wall synthesis. *Plant cell* **1999**, *11*, 769-779.
21. Ha, M. A.; MacKinnon, I. M.; Šturcová, A.; Apperley, D. C.; McCann, M. C.; Turner, S. R.; Jarvis, M. C. Structure of cellulose-deficient secondary cell walls from the irx3 mutant of *Arabidopsis thaliana*. *Phytochemistry* **2002**, *61*, 7-14.
22. Taylor, N. G.; Laurie, S.; Turner, S. R. Multiple cellulose synthase catalytic subunits are required for cellulose synthesis in *Arabidopsis*. *Plant Cell* **2000**, *12*, 2529-2539.
23. Chen, Z.; Hong, X.; Zhang, H.; Wang, Y.; Li, X.; Zhu, J. K.; Gong, Z. Disruption of the cellulose synthase gene, AtCesA8/IRX1, enhances drought and osmotic stress tolerance in *Arabidopsis*. *Plant J* **2005**, *43*, 273-283.

24. Zhang, B.; Deng, L.; Qian, Q.; Xiong, G.; Zeng, D.; Li, R.; Guo, L.; Li, J.; Zhou, Y. A missense mutation in the transmembrane domain of CESA4 affects protein abundance in the plasma membrane and results in abnormal cell wall biosynthesis in rice. *Plant Mol Biol* **2009**, *71*, 509-24.
25. Li, F.; Liu, S.; Xu, H.; Xu, Q. A novel FC17/CESA4 mutation causes increased biomass saccharification and lodging resistance by remodeling cell wall in rice. *Biotechnol Biofuels* **2018**, *11*, 1-13.
26. Rao, Y. C.; Yang, Y. L.; Xin, D. D.; Li, X. J.; Zhai, K. E.; Ma, B. J.; Pan, J. W.; Qian, Q.; Zeng, D. L. Characterization and cloning of a brittle culm mutant (bc88) in rice (*Oryza sativa* L.). *Sci Bull* **2013**, *58*, 3000-3006.
27. Kotake, T.; Aohara, T.; Hirano, K.; Sato, A.; Kaneko, Y.; Tsumuraya, Y.; Takatsuji, H.; Kawasaki, S. Rice Brittle culm 6 encodes a dominant-negative form of CesaA protein that perturbs cellulose synthesis in secondary cell walls. *J Exp Bot* **2011**, *62*, 2053-2062.
28. Ye, Y.; Wang, S.; Wu, K.; Ren, Y.; Jiang, H.; Chen, J.; Tao, L.; Fu, X.; Liu, B.; Wu, Y. A Semi-Dominant Mutation in OsCESA9 Improves Salt Tolerance and Favors Field Straw Decay Traits by Altering Cell Wall Properties in Rice. *Rice (NY)* **2021**, *14*, 1-19.
